# Supplementary material for: Melanoma-Derived BRAFV600E Mutation in Peritumoral Stromal Cells: Implications for in Vivo Cell Fusion
Source: MDPI journal article supplement (doi:10.3390/ijms17060980), 2016-06-21
Supplement: s1 [file s1]

## Supplementary Materials: Melanoma-Derived $BRAF^{V600E}$ Mutation in Peritumoral Stromal Cells: Implications for *in Vivo* Cell Fusion

Zsuzsanna Kurgyis, Lajos V. Kemény, Tünde Buknicz, Gergely Groma, Judit Oláh, Ádám Jakab, Hilda Polyánka, Kurt Zänker, Thomas Dittmar, Lajos Kemény and István B. Németh

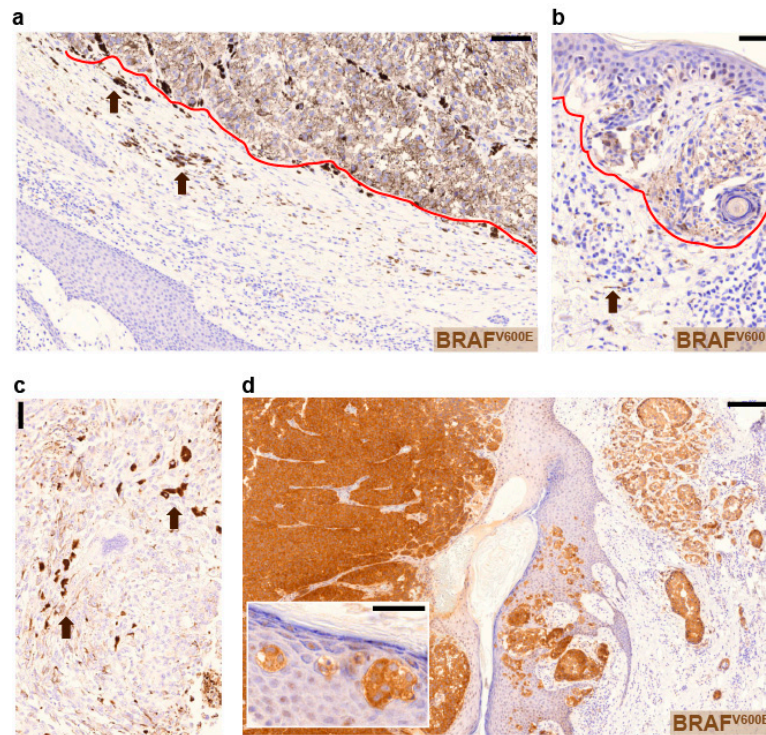

**Figure S1.**  $BRAF^{V600E}$  is not expressed in peritumoral stromal cells  $BRAF^{WT}$  melanoma. (a,b)  $BRAF^{WT}$  melanoma tissue sample stained with  $BRAF^{V600E}$  (light brown) and hematoxylin (blue) (c)  $BRAF^{WT}$  melanoma tissue sample stained without primary antibody; (d)  $BRAF^{V600E}$  melanoma tissue sample stained with  $BRAF^{V600E}$  (light brown) and hematoxylin (blue). Red lines demarcate tumor cells and brown arrows (a–c) indicate dark brown granules that correspond to melanin pigments. Scale bars indicate 100  $\mu$ m (a); 50  $\mu$ m (b, c and d small panel) and 200  $\mu$ m (d large panel).
